# Supplementary material for: Plant-Symbiotic Fungi as Chemical Engineers: Multi-Genome Analysis of the Clavicipitaceae Reveals Dynamics of Alkaloid Loci
Source: PubMed Central journal article supplement (PMC3585121; doi:10.1371/journal.pgen.1003323), 2013-02-28
Supplement: pgen.1003323.s012.pdf [file pgen.1003323.s012.pdf]

## Protocol S1. Fixes for COCO-CL including use of MUSCLE for multiple sequence alignment.

```
#MUSCLE-and-fixes-for-COCO-CL
```

```
diff -ur ../../coco-cl.orig/coco-cl.cpp ./coco-cl.cpp
--- ../../coco-cl.orig/coco-cl.cpp 2006-06-08 17:21:06.000000000 -0400
+++ ./coco-cl.cpp 2011-09-12 11:33:30.000000000 -0400
@@ -159,6 +159,9 @@
    {
        mid = (high+low)/2;                // initially 0.0

+   if (high == mid || low == mid)        // The binary search is as close as
possible.
+       break;
+
        for(int i = 1; i <= f1; i++) // Resetting the group Ids (cluster #) of all
proteins to be 0
            proteinInGroup[i]= 0;

diff -ur ../../coco-cl.orig/bootstrap.pl ./bootstrap.pl
--- ../../coco-cl.orig/bootstrap.pl 2006-06-08 17:06:32.000000000 -0400
+++ ./bootstrap.pl 2011-09-12 11:28:31.000000000 -0400
@@ -56,14 +56,16 @@
# Variables related to bootstrap alignments, dst, cluster, etc files (temporary)
$bootstrapAln = $ARGV[0]; # sampled bootstrap alignment
$bsFastaAln = $ARGV[0]; # sampled bootstrap alignment file in Fasta
format (for Clustalw)
+$bsFastaAlnPp = $ARGV[0]; # preprocessed version for Muscle
$scriptFile = $ARGV[0]; # file containing Clustalw input commands for
the temp bootstrap aln
-$tempDst = $ARGV[0]; # file containing bootstrap temporary distance
matrix
+$tempDst = $ARGV[0]; # file containing bootstrap temporary distance
matrix (clustal format)
$tempCls = $ARGV[0]; # file containing bootstrap temporary cluster
details
$tempPh = $ARGV[0]; # file containing bootstrap temporary tree
$tempNet = $ARGV[0]; # file containing bootstrap temporary Pajek graph
network

    substr($bootstrapAln, -3, 3) = "bootstrap";
    substr($bsFastaAln, -3, 3) = "temp.aln";
+substr($bsFastaAlnPp, -3, 3) = "temp.alnpp";
    substr($scriptFile, -3, 3) = "script";
    substr($tempDst, -3, 3) = "temp.dst";
    substr($tempCls, -3, 3) = "temp.cls";
@@ -141,12 +143,15 @@
    close ALN;

    # writing clustalw options (to be read by clustalw) onto the scriptFile
- open(SCRIPT, ">${scriptFile}") || die "can't open file $scriptFile"; #file
with .script extn
```



```

    $fastaFile = $words[0].".fasta";
    -$dndFile = $words[0].".dnd";
    -system("rm $dndFile");

    system("./fasta2seqgrows.pl $fastaFile");
    $seqgrowsFile = $words[0].".seqgrows";
    diff -ur ../../coco-cl.orig/runClustalW.pl ./runClustalW.pl
    --- ../../coco-cl.orig/runClustalW.pl    2006-06-08 17:06:32.000000000 -0400
    +++ ./runClustalW.pl    2011-04-21 13:30:40.000000000 -0400
    @@ -6,17 +6,24 @@
        die "USAGE: runClustalW.pl <file containing sequences in FASTA format>\n\n";
    }

    -$clustalOptionsFile = $ARGV[0].".cwScript";
    +# $clustalOptionsFile = $ARGV[0].".cwScript";
    $inputFile = $ARGV[0];

    -open(CLUSTALscript, ">$clustalOptionsFile") || die "can't open file
    $clustalOptionsFile";
    -
    -print CLUSTALscript
    "1\n$inputFile\n2\n9\n1\nF\n\n1\n\n\nX\n\n4\n6\n3\n\n4\n\n\n\nX\n\n";
    -
    -close(CLUSTALscript);
    -
    -system("clustalw < $clustalOptionsFile");
    -
    -system("rm $clustalOptionsFile");
    -
    -
    +# open(CLUSTALscript, ">$clustalOptionsFile") || die "can't open file
    $clustalOptionsFile";
    +#
    +# print CLUSTALscript
    "1\n$inputFile\n2\n9\n1\nF\n\n1\n\n\nX\n\n4\n6\n3\n\n4\n\n\n\nX\n\n";
    +#
    +# close(CLUSTALscript);
    +#
    +# system("clustalw < $clustalOptionsFile");
    +#
    +# system("rm $clustalOptionsFile") unless exists $ENV{CCL_KEEP_TEMP};
    +
    +# NFM 2011-04-20 - use clustalw non-interactively.
    +# Run once to do the alignment, once to get a tree.
    +
    +# Output file should always be .fasta.
    +my $outputFile = $inputFile;
    +$outputFile =~ s/[^\.]*$/fasta/;
    +system "clustalw", "-infile=$inputFile", "-align", "-output=FASTA", "-
    outfile=$outputFile";
    +system "clustalw", "-infile=$outputFile", "-tree", "-outputtree=dist";
    diff -ur ../../coco-cl.orig/runMuscle.pl ./runMuscle.pl

```

```

--- ../../coco-cl.orig/runMuscle.pl      1969-12-31 19:00:00.000000000 -0500
+++ ./runMuscle.pl      2011-09-12 11:30:47.000000000 -0400
@@ -0,0 +1,63 @@
+#!/usr/bin/perl -w
+
+use strict;
+
+my $numArgs = $#ARGV + 1;
+if($numArgs != 1)
+{
+ die "USAGE: runMuscle.pl <file containing sequences in FASTA format>\n\n";
+}
+
+my $in_seqs = $ARGV[0];
+
+
+
+# Output file should always be .fasta.
+my $base = $in_seqs;
+$base =~ s/\.[^.]*$//;
+my $im_seqs = "$base.2.fasta";
+
+# Preprocess input FASTA by replacing names with strings unique in the
+# first 10 characters. This is necessary for deciphering muscle's
+# matrix output. This also avoids problems with using the same
+# file for input and output.
+my $i=0;
+my @seqids = ();
+open SEQ_IN, "<", $in_seqs;
+open SEQ_OUT, ">", $im_seqs;
+while(<SEQ_IN>) {
+  chomp;
+  if (/^(.*)/) {
+    $_ = sprintf ">seq%06d %s", $i, $_;
+    $seqids[$i] = $_;
+    ++$i;
+  }
+  print SEQ_OUT "$_\n";
+}
+close SEQ_IN;
+close SEQ_OUT;
+
+my $out_matrix = "$base.dst";
+
+my $im_align = "$base.faln";
+my $out_align = "$base.fasta";
+
+# Generate the .faln FASTA alignment and the .mtx matrix.
+system "muscle", "-fasta", "-in", $im_seqs, "-out", $im_align;
+
+unlink $im_seqs unless exists $ENV{CCL_KEEP_TEMP};
+
+# Move the .faln to $out_align; we couldn't use that as the -out parameter,

```

```
+# because it may have been the same as $in_seqs.
+open ALN_IN, "<", $im_align;
+open ALN_OUT, ">", $out_align;
+while(<ALN_IN>) {
+  chomp;
+  s/^\>seq\d+\s+>/>/;
+  print ALN_OUT "$_\n";
+}
+close ALN_IN;
+close ALN_OUT;
+unlink $im_align unless exists $ENV{CCL_KEEP_TEMP};
+
+system "clustalw", "--infile=$out_align", "-tree", "-outputtree=dist";
+__END__
```
